# Supplementary material for: Organolanthanoid-halide synthons—a new general route to monofunctionalized lanthanoid(ii) compounds?
Source: Royal Society of Chemistry journal article supplement (doi:10.1039/c0cc01317j), 2010-01-01
Supplement: c0cc01317j.pdf [file c0cc01317j.pdf]

Supplementary Information for  
**Organolanthanoid-Halide Synthons – A New General Route to  
Monofunctionalized Lanthanoid(II) Compounds?**

Michal Wiecko, Glen B. Deacon and Peter C. Junk

*School of Chemistry, Monash University, Clayton, Victoria 3800, Australia*

### General Considerations

All manipulations were carried out under N<sub>2</sub> atmosphere using standard Schlenk, vacuum line, and drybox techniques. Solvents were stored over Na/K alloy and distilled prior to use. 3,5-Diphenylpyrazole<sup>i</sup> (HPH<sub>2</sub>pz) was prepared according to a literature procedure. All other reagents were purchased from commercial sources. Elemental Analyses (C, H, N) were performed by the Campbell Microanalytical Laboratories, University of Otago, New Zealand, on samples sealed under argon. Metal analyses were performed by EDTA titrations with Xylenol orange indicator, following acid digestion and buffering with hexamine.<sup>ii</sup> IR spectra are for Nujol mulls on NaCl plates using a *Perkin-Elmer 1600 FTIR* instrument. NMR spectra were obtained using a *Bruker DPX 300 MHz* spectrometer. <sup>171</sup>Yb-NMR spectra are referenced to 0.15 M [Yb(C<sub>5</sub>Me<sub>5</sub>)<sub>2</sub>(THF)] in thf/10 % C<sub>6</sub>D<sub>6</sub>. GC/MS experiments were performed on samples hydrolyzed with H<sub>2</sub>O/EtOH (1:2) with a *Hewlett Packard 6890 Plus GC* with an *Agilent 5973N* detector.

### X-ray Crystallography

Crystals of **1** and **2** were obtained from thf. Crystals of **3** from dme/*n*-hexane. A suitable crystal was covered in viscous mineral oil and mounted onto a glass fiber. The crystal was transferred directly to a cold (123 K) N<sub>2</sub> stream of a Bruker X8 Apex II CCD diffractometer. The structures were solved using conventional methods and refined with anisotropic thermal parameter forms for the non-hydrogen atoms by full-matrix least square on all *F*<sup>2</sup>.data using SHELX97.<sup>iii</sup> Hydrogen atoms were included in calculated positions. The coordinating thf molecules in **1** and **2** were modelled as disordered (with C10A/B and C13A/B disordered over two positions, C16

disordered with half occupancy over a symmetry site). In the structure of **3** two of the total 16 phenyl ligands in the asymmetric unit were modelled as disordered over two positions and were refined using an idealized hexagonal geometry (groups consisting of C55, C56A/B to C60A/B and C121 to 126, C158 to 163 respectively). Two dme molecules around Yb4 show high thermal parameters indicating disorder (C82 and C87) which could not be resolved. In addition two dme molecules in the lattice of **3** were found. One of the molecules was treated as isotropic and refined as disordered over two positions with half occupancy (C145 to C150, O25 to O27). The second (C151 to 154, O29 and O30) was refined giving approximate atomic positions although residual electron density indicates additional disorder (we avoided use of the program SQUEEZE). All efforts to obtain improved structural data for **3** failed, partly due to quick decomposition of the compound upon selection and mounting of the crystals.

**Table 1.** Crystallographic details of **1-3**.

|                                         | <b>1</b>                                                           | <b>2</b>                                                           | <b>2 (3·dme)</b>                                                  |
|-----------------------------------------|--------------------------------------------------------------------|--------------------------------------------------------------------|-------------------------------------------------------------------|
| formula                                 | C <sub>31</sub> H <sub>43</sub> Eu I N <sub>2</sub> O <sub>4</sub> | C <sub>31</sub> H <sub>43</sub> Yb I N <sub>2</sub> O <sub>4</sub> | C <sub>152</sub> H <sub>220</sub> O <sub>28</sub> Yb <sub>6</sub> |
| formula weight                          | 786.53 mol                                                         | 807.61                                                             | 1766.76                                                           |
| space group                             | <i>Pmn</i> 21                                                      | <i>Pmn</i> 21                                                      | <i>P</i> -1                                                       |
| a [Å]                                   | 17.7513(3)                                                         | 17.6761(8)                                                         | 20.1461(7)                                                        |
| b [Å]                                   | 8.7645(2)                                                          | 8.7327(4)                                                          | 20.3068(6)                                                        |
| c [Å]                                   | 10.3139(2)                                                         | 10.1877(5)                                                         | 22.5761(12)                                                       |
| α [°]                                   | 90                                                                 | 90                                                                 | 110.121(2)                                                        |
| β [°]                                   | 90                                                                 | 90                                                                 | 103.298(2)                                                        |
| γ [°]                                   | 90                                                                 | 90                                                                 | 106.657(2)                                                        |
| V [Å <sup>3</sup> ]                     | 1604.65(6)                                                         | 1572.57(13)                                                        | 7734.1(5)                                                         |
| Z                                       | 2                                                                  | 2                                                                  | 2                                                                 |
| ρ <sub>calc.</sub> [g/cm <sup>3</sup> ] | 1.628                                                              | 1.316                                                              | 1.517                                                             |

---

|                           | MoK $\alpha$                          | MoK $\alpha$                          | MoK $\alpha$                           |
|---------------------------|---------------------------------------|---------------------------------------|----------------------------------------|
| radiation                 | ( $\lambda = 0.71073 \text{ \AA}$ )   | ( $\lambda = 0.71073 \text{ \AA}$ )   | ( $\lambda = 0.71073 \text{ \AA}$ )    |
| $\mu$ [mm <sup>-1</sup> ] | 2.952                                 | 3.991                                 | 3.656                                  |
| T [K]                     | 123(1)                                | 123(1)                                | 123(1)                                 |
| abs. correction           | Multi-scan                            | Multi-scan                            | Multi-scan                             |
| reflections;<br>collected | 13764                                 | 13478                                 | 54801                                  |
| reflections;<br>unique    | 3616<br>( $R_{\text{int}} = 0.0204$ ) | 3722<br>( $R_{\text{int}} = 0.0492$ ) | 27110<br>( $R_{\text{int}} = 0.0578$ ) |
| reflections;<br>observed  | 3573                                  | 3515                                  | 27110                                  |
| data, parameters          | 3616, 212                             | 3722, 213                             | 17319, 1756                            |
| $R1$                      | 0.0136                                | 0.0246                                | 0.0485                                 |
| $wR2$                     | 0.0319                                | 0.0489                                | 0.0972                                 |
| GOF                       | 1.060                                 | 1.002                                 | 0.992                                  |

---

### Experimental Supplement

#### *Crystallization attempts on "PhYbI(thf)<sub>n</sub>":*

Yb metal filings (433 mg, 2.5 mmol) were suspended in thf (15 mL) and at -78 °C PhI (408 mg, 2 mmol) was added. The mixture was sonicated for 10 sec. developing a red colour. The mixture was stirred for 3 h at -50 °C and subsequently filtered through a glass frit. The resulting dark red solution was topped with ~ 7 mL of *n*-hexane and cooled to -25 °C. Overnight crystals of [YbI<sub>2</sub>(thf)<sub>4</sub>]<sup>iv</sup> and [YbPh<sub>3</sub>(thf)<sub>3</sub>]<sup>v</sup> had formed and were identified by determination of the unit cell by single crystal X-ray diffraction studies.

#### *Hydrolysis of "PhYbI(thf)<sub>n</sub>":*

To a solution of "PhYbI(thf)<sub>n</sub>" (obtained from Yb and PhI in thf; 3 h at -50° C as described above) a 1:2 mixture of water/EtOH was added at -50° C and slowly warmed to room

temperature. Following a GC/MS analysis the following compounds were identified: Biphenyl:  $m/z = 154 (M^+)$ ,  $153 (M^+ - H)$ ,  $77 (M^+ - C_6H_5)$ ,  $76 (M^+ - C_6H_6)$ ; Phenyltetrahydrofuran:  $m/z = 148 (M^+)$ ,  $147 (M^+ - H)$ ,  $106 (M^+ - (CH_2)_3)$ ,  $105 (M^+ - (CH_2)_3 - H)$ .

*Hydrolysis of "PhYbI(dme)<sub>n</sub>"*:

To a solution of "PhYbI(dme)<sub>n</sub>" (obtained from Yb and PhI in dme; 3 h at -78° C as described for the synthesis of **3**) a 1:2 mixture of water/EtOH was added at -50° C and slowly warmed to room temperature. Following a GC/MS analysis the following compounds were identified: Biphenyl:  $m/z = 154 (M^+)$ ,  $153 (M^+ - H)$ ,  $77 (M^+ - C_6H_5)$ ,  $76 (M^+ - C_6H_6)$ ; Terphenyl:  $m/z = 230 (M^+)$ ; Triphenylbenzene:  $m/z = 306 (M^+)$ .

*Hydrolysis of crude [Yb(Ph<sub>2</sub>pz)I(thf)<sub>4</sub>] (**2**):*

To the mother liquor obtained after isolation of **2** a 1:2 mixture of water/EtOH was added at r.t.. Following a GC/MS analysis biphenyl was identified: Biphenyl:  $m/z = 154 (M^+)$ ,  $153 (M^+ - H)$ ,  $77 (M^+ - C_6H_5)$ ,  $76 (M^+ - C_6H_6)$ .

## Structural Tables

**Table 2:** Bond lengths [ $\text{\AA}$ ] and angles [ $^\circ$ ] for **1**.

---

|               |            |                     |            |
|---------------|------------|---------------------|------------|
| Eu(1)-N(1)    | 2.5353(17) | C(14)-C(13A)        | 1.475(6)   |
| Eu(1)-N(1)#1  | 2.5353(17) | C(14)-C(14)#1       | 1.508(5)   |
| Eu(1)-O(3)    | 2.558(2)   | C(14)-C(13B)        | 1.515(7)   |
| Eu(1)-O(1)#1  | 2.5770(14) | C(15)-C(16)         | 1.560(6)   |
| Eu(1)-O(1)    | 2.5770(14) | C(15)-C(16)#1       | 1.560(6)   |
| Eu(1)-O(2)    | 2.616(2)   | C(16)-C(17)         | 1.470(6)   |
| Eu(1)-I(1)    | 3.1983(2)  | C(17)-C(16)#1       | 1.470(6)   |
| O(1)-C(9)     | 1.438(3)   | C(17)-C(18)         | 1.506(5)   |
| O(1)-C(12)    | 1.438(3)   |                     |            |
| N(1)-C(1)     | 1.348(3)   | N(1)-Eu(1)-N(1)#1   | 31.58(8)   |
| N(1)-N(1)#1   | 1.380(3)   | N(1)-Eu(1)-O(3)     | 82.52(6)   |
| C(1)-C(2)     | 1.393(3)   | N(1)#1-Eu(1)-O(3)   | 82.52(6)   |
| C(1)-C(3)     | 1.470(3)   | N(1)-Eu(1)-O(1)#1   | 116.76(5)  |
| O(2)-C(13B)#1 | 1.429(6)   | N(1)#1-Eu(1)-O(1)#1 | 85.30(5)   |
| O(2)-C(13B)   | 1.429(6)   | O(3)-Eu(1)-O(1)#1   | 86.64(4)   |
| O(2)-C(13A)#1 | 1.440(6)   | N(1)-Eu(1)-O(1)     | 85.30(5)   |
| O(2)-C(13A)   | 1.440(6)   | N(1)#1-Eu(1)-O(1)   | 116.76(5)  |
| C(2)-C(1)#1   | 1.393(3)   | O(3)-Eu(1)-O(1)     | 86.64(4)   |
| O(3)-C(15)    | 1.447(4)   | O(1)#1-Eu(1)-O(1)   | 155.81(7)  |
| O(3)-C(18)    | 1.450(4)   | N(1)-Eu(1)-O(2)     | 156.27(6)  |
| C(3)-C(8)     | 1.390(4)   | N(1)#1-Eu(1)-O(2)   | 156.27(6)  |
| C(3)-C(4)     | 1.398(3)   | O(3)-Eu(1)-O(2)     | 79.83(7)   |
| C(4)-C(5)     | 1.389(3)   | O(1)#1-Eu(1)-O(2)   | 77.97(3)   |
| C(5)-C(6)     | 1.385(4)   | O(1)-Eu(1)-O(2)     | 77.97(3)   |
| C(6)-C(7)     | 1.373(3)   | N(1)-Eu(1)-I(1)     | 108.60(4)  |
| C(7)-C(8)     | 1.393(3)   | N(1)#1-Eu(1)-I(1)   | 108.60(4)  |
| C(9)-C(10B)   | 1.446(7)   | O(3)-Eu(1)-I(1)     | 168.42(5)  |
| C(9)-C(10A)   | 1.504(8)   | O(1)#1-Eu(1)-I(1)   | 90.98(3)   |
| C(11)-C(10A)  | 1.419(8)   | O(1)-Eu(1)-I(1)     | 90.98(3)   |
| C(11)-C(12)   | 1.503(4)   | O(2)-Eu(1)-I(1)     | 88.58(5)   |
| C(11)-C(10B)  | 1.573(8)   | C(9)-O(1)-C(12)     | 109.31(18) |

|                        |            |                      |          |
|------------------------|------------|----------------------|----------|
| C(9)-O(1)-Eu(1)        | 131.06(14) | C(12)-C(11)-C(10B)   | 105.5(3) |
| C(12)-O(1)-Eu(1)       | 119.58(14) | O(1)-C(12)-C(11)     | 106.9(2) |
| C(1)-N(1)-N(1)#1       | 107.75(12) | C(13A)-C(14)-C(14)#1 | 104.5(2) |
| C(1)-N(1)-Eu(1)        | 175.44(15) | C(13A)-C(14)-C(13B)  | 32.4(3)  |
| N(1)#1-N(1)-Eu(1)      | 74.21(4)   | C(14)#1-C(14)-C(13B) | 101.6(3) |
| N(1)-C(1)-C(2)         | 110.00(19) | O(3)-C(15)-C(16)     | 102.6(3) |
| N(1)-C(1)-C(3)         | 121.44(19) | O(3)-C(15)-C(16)#1   | 102.6(3) |
| C(2)-C(1)-C(3)         | 128.6(2)   | C(16)-C(15)-C(16)#1  | 47.9(5)  |
| C(13B)#1-O(2)-C(13B)   | 95.7(5)    | C(17)-C(16)-C(15)    | 100.5(3) |
| C(13B)#1-O(2)-C(13A)#1 | 33.8(3)    | C(16)#1-C(17)-C(16)  | 51.1(5)  |
| C(13B)-O(2)-C(13A)#1   | 109.0(3)   | C(16)#1-C(17)-C(18)  | 104.3(3) |
| C(13B)#1-O(2)-C(13A)   | 109.0(3)   | C(16)-C(17)-C(18)    | 104.3(3) |
| C(13B)-O(2)-C(13A)     | 33.8(3)    | O(3)-C(18)-C(17)     | 105.6(3) |
| C(13A)#1-O(2)-C(13A)   | 102.5(5)   | C(9)-C(10B)-C(11)    | 102.7(4) |
| C(13B)#1-O(2)-Eu(1)    | 130.2(2)   | C(11)-C(10A)-C(9)    | 107.5(4) |
| C(13B)-O(2)-Eu(1)      | 130.2(2)   | O(2)-C(13B)-C(14)    | 105.6(4) |
| C(13A)#1-O(2)-Eu(1)    | 119.8(2)   | O(2)-C(13A)-C(14)    | 107.2(4) |
| C(13A)-O(2)-Eu(1)      | 119.8(2)   |                      |          |
| C(1)#1-C(2)-C(1)       | 104.5(3)   |                      |          |
| C(15)-O(3)-C(18)       | 109.1(3)   |                      |          |
| C(15)-O(3)-Eu(1)       | 126.82(19) |                      |          |
| C(18)-O(3)-Eu(1)       | 124.0(2)   |                      |          |
| C(8)-C(3)-C(4)         | 118.04(19) |                      |          |
| C(8)-C(3)-C(1)         | 120.9(2)   |                      |          |
| C(4)-C(3)-C(1)         | 121.08(19) |                      |          |
| C(5)-C(4)-C(3)         | 120.8(2)   |                      |          |
| C(6)-C(5)-C(4)         | 120.1(2)   |                      |          |
| C(7)-C(6)-C(5)         | 119.9(2)   |                      |          |
| C(6)-C(7)-C(8)         | 120.1(2)   |                      |          |
| C(3)-C(8)-C(7)         | 121.1(2)   |                      |          |
| O(1)-C(9)-C(10B)       | 109.3(3)   |                      |          |
| O(1)-C(9)-C(10A)       | 102.9(4)   |                      |          |
| C(10B)-C(9)-C(10A)     | 33.7(3)    |                      |          |
| C(10A)-C(11)-C(12)     | 102.0(4)   |                      |          |
| C(10A)-C(11)-C(10B)    | 32.8(3)    |                      |          |

---

Symmetry transformations used to generate  
equivalent atoms: #1 -x+2,y,z

**Table 3:** Bond lengths [ $\text{\AA}$ ] and angles [ $^\circ$ ] for **2**.

|               |           |                     |            |
|---------------|-----------|---------------------|------------|
| Yb(1)-N(1)    | 2.433(3)  | C(14)-C(14)#1       | 1.520(11)  |
| Yb(1)-N(1)#1  | 2.433(3)  | C(15)-C(16)#1       | 1.551(11)  |
| Yb(1)-O(3)    | 2.441(4)  | C(15)-C(16)         | 1.551(11)  |
| Yb(1)-O(1)    | 2.473(3)  | C(16)-C(17)         | 1.443(11)  |
| Yb(1)-O(1)#1  | 2.473(3)  | C(17)-C(16)#1       | 1.443(11)  |
| Yb(1)-O(2)    | 2.518(4)  | C(17)-C(18)         | 1.501(9)   |
| Yb(1)-I(1)    | 3.0966(4) |                     |            |
| O(1)-C(12)    | 1.440(5)  | N(1)#1-Yb(1)-N(1)   | 33.02(15)  |
| O(1)-C(9)     | 1.448(5)  | N(1)#1-Yb(1)-O(3)   | 84.61(11)  |
| N(1)-C(1)     | 1.361(5)  | N(1)-Yb(1)-O(3)     | 84.61(11)  |
| N(1)-N(1)#1   | 1.383(6)  | N(1)#1-Yb(1)-O(1)   | 117.63(10) |
| C(1)-C(2)     | 1.392(5)  | N(1)-Yb(1)-O(1)     | 84.71(10)  |
| C(1)-C(3)     | 1.458(6)  | O(3)-Yb(1)-O(1)     | 86.91(7)   |
| O(2)-C(13B)   | 1.439(11) | N(1)#1-Yb(1)-O(1)#1 | 84.71(10)  |
| O(2)-C(13B)#1 | 1.439(11) | N(1)-Yb(1)-O(1)#1   | 117.63(10) |
| O(2)-C(13A)   | 1.468(10) | O(3)-Yb(1)-O(1)#1   | 86.91(7)   |
| O(2)-C(13A)#1 | 1.468(10) | O(1)-Yb(1)-O(1)#1   | 156.09(13) |
| C(2)-C(1)#1   | 1.392(5)  | N(1)#1-Yb(1)-O(2)   | 157.47(10) |
| O(3)-C(15)    | 1.457(7)  | N(1)-Yb(1)-O(2)     | 157.47(10) |
| O(3)-C(18)    | 1.464(7)  | O(3)-Yb(1)-O(2)     | 80.07(13)  |
| C(3)-C(4)     | 1.398(6)  | O(1)-Yb(1)-O(2)     | 78.09(6)   |
| C(3)-C(8)     | 1.404(7)  | O(1)#1-Yb(1)-O(2)   | 78.09(6)   |
| C(4)-C(5)     | 1.392(7)  | N(1)#1-Yb(1)-I(1)   | 106.42(7)  |
| C(5)-C(6)     | 1.392(7)  | N(1)-Yb(1)-I(1)     | 106.42(7)  |
| C(6)-C(7)     | 1.378(6)  | O(3)-Yb(1)-I(1)     | 168.48(9)  |
| C(7)-C(8)     | 1.381(6)  | O(1)-Yb(1)-I(1)     | 90.74(6)   |
| C(9)-C(10B)   | 1.427(16) | O(1)#1-Yb(1)-I(1)   | 90.74(6)   |
| C(9)-C(10A)   | 1.521(13) | O(2)-Yb(1)-I(1)     | 88.40(9)   |
| C(10A)-C(11)  | 1.396(14) | C(12)-O(1)-C(9)     | 109.0(4)   |
| C(11)-C(12)   | 1.504(7)  | C(12)-O(1)-Yb(1)    | 120.0(3)   |
| C(11)-C(10B)  | 1.581(15) | C(9)-O(1)-Yb(1)     | 130.6(3)   |
| C(14)-C(13A)  | 1.467(11) | C(1)-N(1)-N(1)#1    | 107.7(2)   |
| C(14)-C(13B)  | 1.518(12) | C(1)-N(1)-Yb(1)     | 174.5(3)   |

|                        |          |                      |           |
|------------------------|----------|----------------------|-----------|
| N(1)#1-N(1)-Yb(1)      | 73.49(8) | C(13A)-C(14)-C(13B)  | 32.9(5)   |
| N(1)-C(1)-C(2)         | 109.8(4) | C(13A)-C(14)-C(14)#1 | 105.1(4)  |
| N(1)-C(1)-C(3)         | 121.5(4) | C(13B)-C(14)-C(14)#1 | 101.9(5)  |
| C(2)-C(1)-C(3)         | 128.8(4) | O(2)-C(13A)-C(14)    | 106.6(7)  |
| C(13B)-O(2)-C(13B)#1   | 96.3(9)  | O(3)-C(15)-C(16)#1   | 102.9(5)  |
| C(13B)-O(2)-C(13A)     | 33.8(5)  | O(3)-C(15)-C(16)     | 102.9(5)  |
| C(13B)#1-O(2)-C(13A)   | 109.1(5) | C(16)#1-C(15)-C(16)  | 44.6(9)   |
| C(13B)-O(2)-C(13A)#1   | 109.1(5) | C(17)-C(16)-C(15)    | 101.9(6)  |
| C(13B)#1-O(2)-C(13A)#1 | 33.8(5)  | C(16)-C(17)-C(16)#1  | 48.1(9)   |
| C(13A)-O(2)-C(13A)#1   | 102.0(9) | C(16)-C(17)-C(18)    | 105.4(5)  |
| C(13B)-O(2)-Yb(1)      | 130.0(5) | C(16)#1-C(17)-C(18)  | 105.4(5)  |
| C(13B)#1-O(2)-Yb(1)    | 130.0(5) | O(3)-C(18)-C(17)     | 105.4(5)  |
| C(13A)-O(2)-Yb(1)      | 119.9(4) | C(9)-C(10B)-C(11)    | 102.8(10) |
| C(13A)#1-O(2)-Yb(1)    | 119.9(4) | O(2)-C(13B)-C(14)    | 105.4(8)  |
| C(1)-C(2)-C(1)#1       | 105.1(5) |                      |           |
| C(15)-O(3)-C(18)       | 108.5(4) |                      |           |
| C(15)-O(3)-Yb(1)       | 127.6(3) |                      |           |
| C(18)-O(3)-Yb(1)       | 123.9(4) |                      |           |
| C(4)-C(3)-C(8)         | 117.5(4) |                      |           |
| C(4)-C(3)-C(1)         | 121.9(4) |                      |           |
| C(8)-C(3)-C(1)         | 120.6(4) |                      |           |
| C(5)-C(4)-C(3)         | 121.3(4) |                      |           |
| C(4)-C(5)-C(6)         | 119.8(4) |                      |           |
| C(7)-C(6)-C(5)         | 119.6(4) |                      |           |
| C(6)-C(7)-C(8)         | 120.7(4) |                      |           |
| C(7)-C(8)-C(3)         | 121.1(5) |                      |           |
| C(10B)-C(9)-O(1)       | 110.9(6) |                      |           |
| C(10B)-C(9)-C(10A)     | 33.0(7)  |                      |           |
| O(1)-C(9)-C(10A)       | 101.8(6) |                      |           |
| C(11)-C(10A)-C(9)      | 107.5(7) |                      |           |
| C(10A)-C(11)-C(12)     | 103.0(6) |                      |           |
| C(10A)-C(11)-C(10B)    | 32.1(6)  |                      |           |
| C(12)-C(11)-C(10B)     | 105.7(6) |                      |           |
| C(12)-C(11)-H(11B)     | 110.6    |                      |           |
| O(1)-C(12)-C(11)       | 107.0(4) |                      |           |

---

Symmetry transformations used to generate  
equivalent atoms: #1 -x+1,y,z



**Table 2:** Bond lengths [ $\text{\AA}$ ] and angles [ $^\circ$ ] for **3**.

---

|             |           |              |           |
|-------------|-----------|--------------|-----------|
| –           |           |              |           |
| Yb(1)-O(1)  | 2.547(6)  | Yb(5)-C(105) | 2.481(9)  |
| Yb(1)-O(2)  | 2.462(5)  | Yb(5)-C(111) | 2.442(8)  |
| Yb(1)-O(3)  | 2.511(5)  | Yb(6)-O(23)  | 2.469(5)  |
| Yb(1)-O(4)  | 2.524(6)  | Yb(6)-O(24)  | 2.469(6)  |
| Yb(1)-O(5)  | 2.550(6)  | Yb(6)-C(121) | 2.486(10) |
| Yb(1)-O(6)  | 2.509(5)  | Yb(6)-C(127) | 2.462(9)  |
| Yb(1)-O(7)  | 2.500(5)  | Yb(6)-C(133) | 2.419(10) |
| Yb(1)-O(8)  | 2.506(6)  | Yb(6)-C(139) | 2.466(10) |
| Yb(2)-O(9)  | 2.441(5)  | Yb(6)-C(158) | 2.534(11) |
| Yb(2)-O(10) | 2.481(6)  | O(1)-C(2)    | 1.413(10) |
| Yb(2)-C(21) | 2.458(9)  | O(1)-C(1)    | 1.427(10) |
| Yb(2)-C(27) | 2.427(9)  | O(2)-C(4)    | 1.394(10) |
| Yb(2)-C(33) | 2.432(8)  | O(2)-C(3)    | 1.397(10) |
| Yb(2)-C(39) | 2.475(9)  | O(3)-C(6)    | 1.412(9)  |
| Yb(3)-O(11) | 2.461(5)  | O(3)-C(5)    | 1.438(10) |
| Yb(3)-O(12) | 2.423(6)  | O(4)-C(7)    | 1.428(10) |
| Yb(3)-C(49) | 2.456(9)  | O(4)-C(8)    | 1.430(10) |
| Yb(3)-C(55) | 2.430(6)  | O(5)-C(10)   | 1.438(9)  |
| Yb(3)-C(61) | 2.424(8)  | O(5)-C(9)    | 1.446(10) |
| Yb(3)-C(67) | 2.466(8)  | O(6)-C(11)   | 1.434(10) |
| Yb(4)-O(13) | 2.477(7)  | O(6)-C(12)   | 1.437(10) |
| Yb(4)-O(14) | 2.483(6)  | O(7)-C(13)   | 1.417(10) |
| Yb(4)-O(15) | 2.515(7)  | O(7)-C(14)   | 1.452(10) |
| Yb(4)-O(16) | 2.424(6)  | O(8)-C(16)   | 1.402(10) |
| Yb(4)-O(17) | 2.462(7)  | O(8)-C(15)   | 1.441(10) |
| Yb(4)-O(18) | 2.526(8)  | O(9)-C(17)   | 1.430(10) |
| Yb(4)-O(19) | 2.496(7)  | O(9)-C(18)   | 1.436(10) |
| Yb(4)-O(20) | 2.483(7)  | O(10)-C(20)  | 1.423(10) |
| Yb(5)-O(21) | 2.453(6)  | O(10)-C(19)  | 1.440(9)  |
| Yb(5)-O(22) | 2.439(5)  | O(11)-C(45)  | 1.415(10) |
| Yb(5)-C(93) | 2.459(9)  | O(11)-C(46)  | 1.449(11) |
| Yb(5)-C(99) | 2.409(10) | O(12)-C(48)  | 1.423(10) |

|              |           |             |           |
|--------------|-----------|-------------|-----------|
| O(12)-C(47)  | 1.426(9)  | C(2)-C(3)   | 1.447(13) |
| O(13)-C(73)  | 1.437(11) | C(6)-C(7)   | 1.468(12) |
| O(13)-C(74)  | 1.509(12) | C(10)-C(11) | 1.478(13) |
| O(14)-C(75)  | 1.408(13) | C(14)-C(15) | 1.474(12) |
| O(14)-C(76)  | 1.430(11) | C(18)-C(19) | 1.477(12) |
| O(15)-C(77)  | 1.370(15) | C(21)-C(22) | 1.390(11) |
| O(15)-C(78)  | 1.445(12) | C(21)-C(26) | 1.419(12) |
| O(16)-C(80)  | 1.362(12) | C(22)-C(23) | 1.409(13) |
| O(16)-C(79)  | 1.417(13) | C(23)-C(24) | 1.376(13) |
| O(17)-C(81)  | 1.384(15) | C(24)-C(25) | 1.390(13) |
| O(17)-C(82)  | 1.469(17) | C(25)-C(26) | 1.397(13) |
| O(18)-C(84)  | 1.386(16) | C(27)-C(32) | 1.405(12) |
| O(18)-C(83)  | 1.413(15) | C(27)-C(28) | 1.422(12) |
| O(19)-C(85)  | 1.397(11) | C(28)-C(29) | 1.395(12) |
| O(19)-C(86)  | 1.406(13) | C(29)-C(30) | 1.368(12) |
| O(20)-C(87)  | 1.402(15) | C(30)-C(31) | 1.373(12) |
| O(20)-C(88)  | 1.418(11) | C(31)-C(32) | 1.394(12) |
| O(21)-C(90)  | 1.439(10) | C(33)-C(34) | 1.392(11) |
| O(21)-C(89)  | 1.449(10) | C(33)-C(38) | 1.421(13) |
| O(22)-C(91)  | 1.392(11) | C(34)-C(35) | 1.371(11) |
| O(22)-C(92)  | 1.438(10) | C(35)-C(36) | 1.398(12) |
| O(23)-C(118) | 1.418(11) | C(36)-C(37) | 1.375(11) |
| O(23)-C(117) | 1.462(10) | C(37)-C(38) | 1.364(11) |
| O(24)-C(119) | 1.439(10) | C(39)-C(44) | 1.388(12) |
| O(24)-C(120) | 1.445(10) | C(39)-C(40) | 1.401(12) |
| O(25)-C(146) | 1.292(15) | C(40)-C(41) | 1.401(12) |
| O(25)-C(145) | 1.34(3)   | C(41)-C(42) | 1.348(14) |
| O(26)-C(147) | 1.39(3)   | C(42)-C(43) | 1.363(13) |
| O(26)-C(148) | 1.394(17) | C(43)-C(44) | 1.400(12) |
| O(27)-C(149) | 1.45(3)   | C(46)-C(47) | 1.473(12) |
| O(28)-C(150) | 1.38(2)   | C(49)-C(54) | 1.400(12) |
| O(29)-C(152) | 1.27(3)   | C(49)-C(50) | 1.416(12) |
| O(29)-C(151) | 1.28(3)   | C(50)-C(51) | 1.395(12) |
| O(30)-C(153) | 1.35(3)   | C(51)-C(52) | 1.333(13) |
| O(30)-C(154) | 1.51(4)   | C(52)-C(53) | 1.378(14) |

|               |           |               |           |
|---------------|-----------|---------------|-----------|
| C(53)-C(54)   | 1.375(12) | C(97)-C(98)   | 1.393(13) |
| C(55)-C(60A)  | 1.377(8)  | C(99)-C(104)  | 1.381(13) |
| C(55)-C(56B)  | 1.399(8)  | C(99)-C(100)  | 1.394(13) |
| C(55)-C(56A)  | 1.403(8)  | C(100)-C(101) | 1.385(13) |
| C(55)-C(60B)  | 1.407(8)  | C(101)-C(102) | 1.358(15) |
| C(56A)-C(57A) | 1.395(8)  | C(102)-C(103) | 1.365(15) |
| C(56B)-C(57B) | 1.389(8)  | C(103)-C(104) | 1.409(14) |
| C(57A)-C(58A) | 1.390(8)  | C(105)-C(106) | 1.385(12) |
| C(57B)-C(58B) | 1.387(8)  | C(105)-C(110) | 1.391(12) |
| C(58A)-C(59A) | 1.392(8)  | C(106)-C(107) | 1.353(13) |
| C(58B)-C(59B) | 1.393(8)  | C(107)-C(108) | 1.387(14) |
| C(59A)-C(60A) | 1.393(8)  | C(108)-C(109) | 1.362(13) |
| C(59B)-C(60B) | 1.389(8)  | C(109)-C(110) | 1.372(12) |
| C(61)-C(66)   | 1.379(12) | C(111)-C(116) | 1.365(12) |
| C(61)-C(62)   | 1.397(11) | C(111)-C(112) | 1.407(12) |
| C(62)-C(63)   | 1.401(13) | C(112)-C(113) | 1.386(11) |
| C(63)-C(64)   | 1.364(14) | C(113)-C(114) | 1.378(14) |
| C(64)-C(65)   | 1.354(13) | C(114)-C(115) | 1.351(15) |
| C(65)-C(66)   | 1.387(12) | C(115)-C(116) | 1.384(12) |
| C(67)-C(68)   | 1.379(11) | C(118)-C(119) | 1.483(13) |
| C(67)-C(72)   | 1.417(12) | C(121)-C(122) | 1.394(8)  |
| C(68)-C(69)   | 1.381(12) | C(121)-C(126) | 1.400(8)  |
| C(69)-C(70)   | 1.387(12) | C(122)-C(123) | 1.384(8)  |
| C(70)-C(71)   | 1.379(12) | C(123)-C(124) | 1.395(8)  |
| C(71)-C(72)   | 1.394(13) | C(124)-C(125) | 1.385(8)  |
| C(74)-C(75)   | 1.409(16) | C(125)-C(126) | 1.392(8)  |
| C(78)-C(79)   | 1.515(16) | C(127)-C(132) | 1.392(13) |
| C(82)-C(83)   | 1.40(2)   | C(127)-C(128) | 1.396(14) |
| C(86)-C(87)   | 1.450(16) | C(128)-C(129) | 1.380(14) |
| C(90)-C(91)   | 1.468(13) | C(129)-C(130) | 1.324(19) |
| C(93)-C(98)   | 1.403(12) | C(130)-C(131) | 1.390(19) |
| C(93)-C(94)   | 1.425(11) | C(131)-C(132) | 1.401(13) |
| C(94)-C(95)   | 1.374(12) | C(133)-C(134) | 1.391(13) |
| C(95)-C(96)   | 1.371(12) | C(133)-C(138) | 1.412(12) |
| C(96)-C(97)   | 1.383(12) | C(134)-C(135) | 1.395(13) |

|                 |            |                   |            |
|-----------------|------------|-------------------|------------|
| C(135)-C(136)   | 1.360(13)  | O(8)-Yb(1)-O(1)   | 109.00(19) |
| C(136)-C(137)   | 1.357(13)  | O(6)-Yb(1)-O(1)   | 135.7(2)   |
| C(137)-C(138)   | 1.405(13)  | O(3)-Yb(1)-O(1)   | 89.39(19)  |
| C(139)-C(144)   | 1.395(14)  | O(4)-Yb(1)-O(1)   | 71.6(2)    |
| C(139)-C(140)   | 1.397(14)  | O(2)-Yb(1)-O(5)   | 133.4(2)   |
| C(140)-C(141)   | 1.405(17)  | O(7)-Yb(1)-O(5)   | 87.76(18)  |
| C(141)-C(142)   | 1.39(2)    | O(8)-Yb(1)-O(5)   | 72.13(19)  |
| C(142)-C(143)   | 1.34(2)    | O(6)-Yb(1)-O(5)   | 64.78(18)  |
| C(143)-C(144)   | 1.367(16)  | O(3)-Yb(1)-O(5)   | 76.85(19)  |
| C(146)-C(147)   | 1.50(3)    | O(4)-Yb(1)-O(5)   | 115.87(18) |
| C(158)-C(163)   | 1.398(8)   | O(1)-Yb(1)-O(5)   | 158.5(2)   |
| C(158)-C(159)   | 1.399(8)   | C(27)-Yb(2)-C(33) | 106.8(3)   |
| C(159)-C(160)   | 1.388(8)   | C(27)-Yb(2)-O(9)  | 95.4(2)    |
| C(160)-C(161)   | 1.391(8)   | C(33)-Yb(2)-O(9)  | 157.2(3)   |
| C(161)-C(162)   | 1.386(8)   | C(27)-Yb(2)-C(21) | 90.9(3)    |
| C(162)-C(163)   | 1.390(8)   | C(33)-Yb(2)-C(21) | 99.7(3)    |
| C(152)-C(153)   | 1.48(3)    | O(9)-Yb(2)-C(21)  | 85.2(2)    |
|                 |            | C(27)-Yb(2)-C(39) | 95.6(3)    |
| O(2)-Yb(1)-O(7) | 105.50(18) | C(33)-Yb(2)-C(39) | 90.8(3)    |
| O(2)-Yb(1)-O(8) | 73.9(2)    | O(9)-Yb(2)-C(39)  | 81.3(2)    |
| O(7)-Yb(1)-O(8) | 64.84(18)  | C(21)-Yb(2)-C(39) | 165.5(3)   |
| O(2)-Yb(1)-O(6) | 84.69(19)  | C(27)-Yb(2)-O(10) | 161.3(2)   |
| O(7)-Yb(1)-O(6) | 148.18(19) | C(33)-Yb(2)-O(10) | 91.5(2)    |
| O(8)-Yb(1)-O(6) | 90.37(18)  | O(9)-Yb(2)-O(10)  | 66.94(18)  |
| O(2)-Yb(1)-O(3) | 147.7(2)   | C(21)-Yb(2)-O(10) | 82.1(3)    |
| O(7)-Yb(1)-O(3) | 83.38(17)  | C(39)-Yb(2)-O(10) | 87.8(2)    |
| O(8)-Yb(1)-O(3) | 135.73(19) | O(12)-Yb(3)-C(61) | 93.7(2)    |
| O(6)-Yb(1)-O(3) | 104.18(17) | O(12)-Yb(3)-C(55) | 162.8(2)   |
| O(2)-Yb(1)-O(4) | 87.02(19)  | C(61)-Yb(3)-C(55) | 103.5(3)   |
| O(7)-Yb(1)-O(4) | 133.55(19) | O(12)-Yb(3)-C(49) | 82.5(2)    |
| O(8)-Yb(1)-O(4) | 157.57(19) | C(61)-Yb(3)-C(49) | 96.6(3)    |
| O(6)-Yb(1)-O(4) | 75.94(19)  | C(55)-Yb(3)-C(49) | 96.6(3)    |
| O(3)-Yb(1)-O(4) | 65.93(18)  | O(12)-Yb(3)-O(11) | 68.12(19)  |
| O(2)-Yb(1)-O(1) | 64.5(2)    | C(61)-Yb(3)-O(11) | 161.7(2)   |
| O(7)-Yb(1)-O(1) | 74.19(19)  | C(55)-Yb(3)-O(11) | 94.8(2)    |

|                   |          |                     |           |
|-------------------|----------|---------------------|-----------|
| C(49)-Yb(3)-O(11) | 80.4(2)  | C(99)-Yb(5)-C(111)  | 108.3(3)  |
| O(12)-Yb(3)-C(67) | 79.6(2)  | O(22)-Yb(5)-C(111)  | 156.5(3)  |
| C(61)-Yb(3)-C(67) | 94.7(3)  | C(99)-Yb(5)-O(21)   | 160.5(2)  |
| C(55)-Yb(3)-C(67) | 97.5(3)  | O(22)-Yb(5)-O(21)   | 66.78(19) |
| C(49)-Yb(3)-C(67) | 159.4(3) | C(111)-Yb(5)-O(21)  | 90.3(2)   |
| O(11)-Yb(3)-C(67) | 83.5(2)  | C(99)-Yb(5)-C(93)   | 89.9(3)   |
| O(16)-Yb(4)-O(17) | 78.6(3)  | O(22)-Yb(5)-C(93)   | 85.1(2)   |
| O(16)-Yb(4)-O(13) | 120.2(3) | C(111)-Yb(5)-C(93)  | 96.9(3)   |
| O(17)-Yb(4)-O(13) | 127.6(3) | O(21)-Yb(5)-C(93)   | 81.6(3)   |
| O(16)-Yb(4)-O(14) | 76.0(2)  | C(99)-Yb(5)-C(105)  | 95.0(3)   |
| O(17)-Yb(4)-O(14) | 154.5(3) | O(22)-Yb(5)-C(105)  | 79.5(2)   |
| O(13)-Yb(4)-O(14) | 65.4(2)  | C(111)-Yb(5)-C(105) | 95.7(3)   |
| O(16)-Yb(4)-O(20) | 155.1(2) | O(21)-Yb(5)-C(105)  | 89.0(2)   |
| O(17)-Yb(4)-O(20) | 76.6(3)  | C(93)-Yb(5)-C(105)  | 164.2(3)  |
| O(13)-Yb(4)-O(20) | 77.8(3)  | C(133)-Yb(6)-C(127) | 110.6(3)  |
| O(14)-Yb(4)-O(20) | 128.9(2) | C(133)-Yb(6)-C(139) | 92.8(3)   |
| O(16)-Yb(4)-O(19) | 128.2(2) | C(127)-Yb(6)-C(139) | 96.4(3)   |
| O(17)-Yb(4)-O(19) | 123.0(3) | C(133)-Yb(6)-O(23)  | 88.1(2)   |
| O(13)-Yb(4)-O(19) | 85.3(3)  | C(127)-Yb(6)-O(23)  | 160.5(3)  |
| O(14)-Yb(4)-O(19) | 76.3(2)  | C(139)-Yb(6)-O(23)  | 87.8(3)   |
| O(20)-Yb(4)-O(19) | 66.1(2)  | C(133)-Yb(6)-O(24)  | 153.8(2)  |
| O(16)-Yb(4)-O(15) | 64.3(3)  | C(127)-Yb(6)-O(24)  | 94.8(3)   |
| O(17)-Yb(4)-O(15) | 77.0(3)  | C(139)-Yb(6)-O(24)  | 77.8(3)   |
| O(13)-Yb(4)-O(15) | 154.9(3) | O(23)-Yb(6)-O(24)   | 67.4(2)   |
| O(14)-Yb(4)-O(15) | 94.3(3)  | C(133)-Yb(6)-C(121) | 107.3(4)  |
| O(20)-Yb(4)-O(15) | 107.4(3) | C(127)-Yb(6)-C(121) | 87.4(5)   |
| O(19)-Yb(4)-O(15) | 75.2(3)  | C(139)-Yb(6)-C(121) | 156.8(5)  |
| O(16)-Yb(4)-O(18) | 78.6(3)  | O(23)-Yb(6)-C(121)  | 81.6(5)   |
| O(17)-Yb(4)-O(18) | 64.2(3)  | O(24)-Yb(6)-C(121)  | 79.1(4)   |
| O(13)-Yb(4)-O(18) | 72.2(3)  | C(133)-Yb(6)-C(158) | 98.0(4)   |
| O(14)-Yb(4)-O(18) | 107.5(3) | C(127)-Yb(6)-C(158) | 94.1(5)   |
| O(20)-Yb(4)-O(18) | 92.6(3)  | C(139)-Yb(6)-C(158) | 161.3(5)  |
| O(19)-Yb(4)-O(18) | 152.1(3) | O(23)-Yb(6)-C(158)  | 77.3(5)   |
| O(15)-Yb(4)-O(18) | 130.7(3) | O(24)-Yb(6)-C(158)  | 85.9(4)   |
| C(99)-Yb(5)-O(22) | 95.1(2)  | C(121)-Yb(6)-C(158) | 9.9(4)    |

|                   |          |                     |           |
|-------------------|----------|---------------------|-----------|
| C(2)-O(1)-C(1)    | 113.8(7) | C(47)-O(12)-Yb(3)   | 114.8(5)  |
| C(2)-O(1)-Yb(1)   | 113.0(6) | C(73)-O(13)-C(74)   | 113.9(9)  |
| C(1)-O(1)-Yb(1)   | 124.7(5) | C(73)-O(13)-Yb(4)   | 123.4(7)  |
| C(4)-O(2)-C(3)    | 111.2(7) | C(74)-O(13)-Yb(4)   | 112.7(6)  |
| C(4)-O(2)-Yb(1)   | 127.0(5) | C(75)-O(14)-C(76)   | 109.4(8)  |
| C(3)-O(2)-Yb(1)   | 121.5(5) | C(75)-O(14)-Yb(4)   | 121.3(6)  |
| C(6)-O(3)-C(5)    | 110.2(6) | C(76)-O(14)-Yb(4)   | 127.5(6)  |
| C(6)-O(3)-Yb(1)   | 112.1(5) | C(77)-O(15)-C(78)   | 112.9(10) |
| C(5)-O(3)-Yb(1)   | 122.8(5) | C(77)-O(15)-Yb(4)   | 128.1(8)  |
| C(7)-O(4)-C(8)    | 111.3(7) | C(78)-O(15)-Yb(4)   | 117.1(7)  |
| C(7)-O(4)-Yb(1)   | 115.2(5) | C(80)-O(16)-C(79)   | 112.9(9)  |
| C(8)-O(4)-Yb(1)   | 123.9(5) | C(80)-O(16)-Yb(4)   | 129.3(7)  |
| C(10)-O(5)-C(9)   | 109.5(7) | C(79)-O(16)-Yb(4)   | 116.5(6)  |
| C(10)-O(5)-Yb(1)  | 118.2(5) | C(81)-O(17)-C(82)   | 113.5(10) |
| C(9)-O(5)-Yb(1)   | 125.0(5) | C(81)-O(17)-Yb(4)   | 124.5(9)  |
| C(11)-O(6)-C(12)  | 110.4(6) | C(82)-O(17)-Yb(4)   | 120.6(9)  |
| C(11)-O(6)-Yb(1)  | 114.0(5) | C(84)-O(18)-C(83)   | 112.6(11) |
| C(12)-O(6)-Yb(1)  | 123.6(5) | C(84)-O(18)-Yb(4)   | 123.4(9)  |
| C(13)-O(7)-C(14)  | 109.6(6) | C(83)-O(18)-Yb(4)   | 113.8(9)  |
| C(13)-O(7)-Yb(1)  | 129.3(5) | C(85)-O(19)-C(86)   | 112.5(9)  |
| C(14)-O(7)-Yb(1)  | 120.1(5) | C(85)-O(19)-Yb(4)   | 124.4(7)  |
| C(16)-O(8)-C(15)  | 113.0(7) | C(86)-O(19)-Yb(4)   | 117.3(7)  |
| C(16)-O(8)-Yb(1)  | 131.0(5) | C(87)-O(20)-C(88)   | 113.9(9)  |
| C(15)-O(8)-Yb(1)  | 112.6(5) | C(87)-O(20)-Yb(4)   | 117.6(7)  |
| C(17)-O(9)-C(18)  | 111.7(6) | C(88)-O(20)-Yb(4)   | 127.1(7)  |
| C(17)-O(9)-Yb(2)  | 119.3(5) | C(90)-O(21)-C(89)   | 111.3(7)  |
| C(18)-O(9)-Yb(2)  | 113.6(5) | C(90)-O(21)-Yb(5)   | 115.1(5)  |
| C(20)-O(10)-C(19) | 110.5(7) | C(89)-O(21)-Yb(5)   | 119.3(5)  |
| C(20)-O(10)-Yb(2) | 120.3(5) | C(91)-O(22)-C(92)   | 111.8(6)  |
| C(19)-O(10)-Yb(2) | 115.1(5) | C(91)-O(22)-Yb(5)   | 112.6(5)  |
| C(45)-O(11)-C(46) | 110.0(6) | C(92)-O(22)-Yb(5)   | 122.2(5)  |
| C(45)-O(11)-Yb(3) | 119.5(5) | C(118)-O(23)-C(117) | 110.8(7)  |
| C(46)-O(11)-Yb(3) | 112.5(5) | C(118)-O(23)-Yb(6)  | 113.6(5)  |
| C(48)-O(12)-C(47) | 113.0(7) | C(117)-O(23)-Yb(6)  | 120.3(5)  |
| C(48)-O(12)-Yb(3) | 121.7(5) | C(119)-O(24)-C(120) | 110.7(7)  |

|                     |           |                     |           |
|---------------------|-----------|---------------------|-----------|
| C(119)-O(24)-Yb(6)  | 113.3(5)  | C(35)-C(34)-C(33)   | 123.9(9)  |
| C(120)-O(24)-Yb(6)  | 117.0(5)  | C(34)-C(35)-C(36)   | 119.7(8)  |
| C(146)-O(25)-C(145) | 110.5(15) | C(37)-C(36)-C(35)   | 119.0(8)  |
| C(147)-O(26)-C(148) | 118.3(17) | C(38)-C(37)-C(36)   | 120.0(9)  |
| C(152)-O(29)-C(151) | 137(3)    | C(37)-C(38)-C(33)   | 123.7(8)  |
| C(153)-O(30)-C(154) | 103(3)    | C(44)-C(39)-C(40)   | 112.8(8)  |
| O(1)-C(2)-C(3)      | 111.9(8)  | C(44)-C(39)-Yb(2)   | 121.5(7)  |
| O(2)-C(3)-C(2)      | 111.4(8)  | C(40)-C(39)-Yb(2)   | 125.3(7)  |
| O(3)-C(6)-C(7)      | 109.6(6)  | C(39)-C(40)-C(41)   | 123.6(9)  |
| O(4)-C(7)-C(6)      | 107.9(7)  | C(42)-C(41)-C(40)   | 119.4(9)  |
| O(5)-C(10)-C(11)    | 107.7(8)  | C(41)-C(42)-C(43)   | 121.1(10) |
| O(6)-C(11)-C(10)    | 110.1(7)  | C(42)-C(43)-C(44)   | 117.9(10) |
| O(7)-C(14)-C(15)    | 108.6(7)  | C(39)-C(44)-C(43)   | 125.2(9)  |
| O(8)-C(15)-C(14)    | 110.1(7)  | O(11)-C(46)-C(47)   | 107.7(7)  |
| O(9)-C(18)-C(19)    | 107.9(7)  | O(12)-C(47)-C(46)   | 109.3(7)  |
| O(10)-C(19)-C(18)   | 107.7(7)  | C(54)-C(49)-C(50)   | 112.8(8)  |
| C(22)-C(21)-C(26)   | 112.5(8)  | C(54)-C(49)-Yb(3)   | 125.4(7)  |
| C(22)-C(21)-Yb(2)   | 124.4(7)  | C(50)-C(49)-Yb(3)   | 121.7(6)  |
| C(26)-C(21)-Yb(2)   | 123.0(6)  | C(51)-C(50)-C(49)   | 123.3(9)  |
| C(21)-C(22)-C(23)   | 124.4(9)  | C(52)-C(51)-C(50)   | 120.1(10) |
| C(24)-C(23)-C(22)   | 120.7(9)  | C(51)-C(52)-C(53)   | 120.0(10) |
| C(23)-C(24)-C(25)   | 117.7(9)  | C(54)-C(53)-C(52)   | 119.8(10) |
| C(24)-C(25)-C(26)   | 120.3(10) | C(53)-C(54)-C(49)   | 123.9(9)  |
| C(25)-C(26)-C(21)   | 124.3(9)  | C(60A)-C(55)-C(56B) | 103.4(7)  |
| C(32)-C(27)-C(28)   | 111.1(8)  | C(60A)-C(55)-C(56A) | 120.6(7)  |
| C(32)-C(27)-Yb(2)   | 126.8(7)  | C(56B)-C(55)-C(56A) | 17.3(6)   |
| C(28)-C(27)-Yb(2)   | 121.5(6)  | C(60A)-C(55)-C(60B) | 15.4(10)  |
| C(29)-C(28)-C(27)   | 124.5(8)  | C(56B)-C(55)-C(60B) | 117.6(6)  |
| C(30)-C(29)-C(28)   | 120.2(9)  | C(56A)-C(55)-C(60B) | 134.8(7)  |
| C(29)-C(30)-C(31)   | 119.0(9)  | C(60A)-C(55)-Yb(3)  | 123.1(6)  |
| C(30)-C(31)-C(32)   | 119.4(8)  | C(56B)-C(55)-Yb(3)  | 133.1(7)  |
| C(31)-C(32)-C(27)   | 125.7(9)  | C(56A)-C(55)-Yb(3)  | 116.2(6)  |
| C(34)-C(33)-C(38)   | 113.7(7)  | C(60B)-C(55)-Yb(3)  | 108.2(6)  |
| C(34)-C(33)-Yb(2)   | 120.3(6)  | C(57A)-C(56A)-C(55) | 119.5(7)  |
| C(38)-C(33)-Yb(2)   | 125.6(6)  | C(57B)-C(56B)-C(55) | 121.2(7)  |

|                      |           |                      |           |
|----------------------|-----------|----------------------|-----------|
| C(58A)-C(57A)-C(56A) | 119.4(7)  | C(98)-C(93)-Yb(5)    | 121.2(6)  |
| C(58B)-C(57B)-C(56B) | 120.6(7)  | C(94)-C(93)-Yb(5)    | 125.3(6)  |
| C(57A)-C(58A)-C(59A) | 120.8(7)  | C(95)-C(94)-C(93)    | 124.1(8)  |
| C(57B)-C(58B)-C(59B) | 119.2(7)  | C(96)-C(95)-C(94)    | 120.5(9)  |
| C(58A)-C(59A)-C(60A) | 119.5(7)  | C(95)-C(96)-C(97)    | 118.3(9)  |
| C(60B)-C(59B)-C(58B) | 120.1(7)  | C(96)-C(97)-C(98)    | 121.0(9)  |
| C(55)-C(60A)-C(59A)  | 120.0(7)  | C(97)-C(98)-C(93)    | 123.0(9)  |
| C(59B)-C(60B)-C(55)  | 121.2(7)  | C(104)-C(99)-C(100)  | 112.8(9)  |
| C(66)-C(61)-C(62)    | 113.1(8)  | C(104)-C(99)-Yb(5)   | 121.1(7)  |
| C(66)-C(61)-Yb(3)    | 125.6(6)  | C(100)-C(99)-Yb(5)   | 126.0(7)  |
| C(62)-C(61)-Yb(3)    | 121.3(7)  | C(101)-C(100)-C(99)  | 123.5(11) |
| C(61)-C(62)-C(63)    | 123.8(10) | C(102)-C(101)-C(100) | 121.3(11) |
| C(64)-C(63)-C(62)    | 119.2(9)  | C(101)-C(102)-C(103) | 118.5(11) |
| C(65)-C(64)-C(63)    | 119.6(9)  | C(102)-C(103)-C(104) | 119.0(12) |
| C(64)-C(65)-C(66)    | 119.8(10) | C(99)-C(104)-C(103)  | 124.8(11) |
| C(61)-C(66)-C(65)    | 124.5(9)  | C(106)-C(105)-C(110) | 110.8(8)  |
| C(68)-C(67)-C(72)    | 112.6(8)  | C(106)-C(105)-Yb(5)  | 124.6(7)  |
| C(68)-C(67)-Yb(3)    | 122.1(6)  | C(110)-C(105)-Yb(5)  | 124.3(6)  |
| C(72)-C(67)-Yb(3)    | 125.0(6)  | C(107)-C(106)-C(105) | 126.0(10) |
| C(67)-C(68)-C(69)    | 125.5(8)  | C(106)-C(107)-C(108) | 119.2(9)  |
| C(68)-C(69)-C(70)    | 119.4(8)  | C(109)-C(108)-C(107) | 119.3(10) |
| C(71)-C(70)-C(69)    | 118.9(8)  | C(108)-C(109)-C(110) | 117.8(10) |
| C(70)-C(71)-C(72)    | 119.4(9)  | C(109)-C(110)-C(105) | 126.9(9)  |
| C(71)-C(72)-C(67)    | 124.1(8)  | C(116)-C(111)-C(112) | 112.4(8)  |
| C(75)-C(74)-O(13)    | 112.1(11) | C(116)-C(111)-Yb(5)  | 121.3(7)  |
| O(14)-C(75)-C(74)    | 109.6(10) | C(112)-C(111)-Yb(5)  | 126.3(6)  |
| O(15)-C(78)-C(79)    | 109.2(9)  | C(113)-C(112)-C(111) | 124.1(9)  |
| O(16)-C(79)-C(78)    | 103.6(9)  | C(114)-C(113)-C(112) | 119.1(9)  |
| C(83)-C(82)-O(17)    | 107.7(10) | C(115)-C(114)-C(113) | 119.4(9)  |
| C(82)-C(83)-O(18)    | 112.7(11) | C(114)-C(115)-C(116) | 119.2(10) |
| O(19)-C(86)-C(87)    | 112.1(11) | C(111)-C(116)-C(115) | 125.8(10) |
| O(20)-C(87)-C(86)    | 115.3(12) | O(23)-C(118)-C(119)  | 109.4(8)  |
| O(21)-C(90)-C(91)    | 108.2(8)  | O(24)-C(119)-C(118)  | 106.9(7)  |
| O(22)-C(91)-C(90)    | 107.8(8)  | C(122)-C(121)-C(126) | 118.5(7)  |
| C(98)-C(93)-C(94)    | 113.1(8)  | C(122)-C(121)-Yb(6)  | 119.0(7)  |



|                      |           |                      |          |
|----------------------|-----------|----------------------|----------|
| C(126)-C(121)-Yb(6)  | 122.3(7)  | C(160)-C(159)-C(158) | 120.3(7) |
| C(123)-C(122)-C(121) | 120.7(7)  | C(159)-C(160)-C(161) | 120.0(7) |
| C(122)-C(123)-C(124) | 120.0(7)  | C(162)-C(161)-C(160) | 120.2(7) |
| C(125)-C(124)-C(123) | 119.8(7)  | C(161)-C(162)-C(163) | 119.9(7) |
| C(124)-C(125)-C(126) | 119.7(7)  | C(162)-C(163)-C(158) | 120.4(7) |
| C(125)-C(126)-C(121) | 120.9(7)  | O(29)-C(152)-C(153)  | 141(3)   |
| C(132)-C(127)-C(128) | 113.9(9)  | O(30)-C(153)-C(152)  | 124(3)   |
| C(132)-C(127)-Yb(6)  | 120.2(7)  |                      |          |
| C(128)-C(127)-Yb(6)  | 125.7(8)  |                      |          |
| C(129)-C(128)-C(127) | 123.2(12) |                      |          |
| C(130)-C(129)-C(128) | 120.6(14) |                      |          |
| C(129)-C(130)-C(131) | 120.9(11) |                      |          |
| C(130)-C(131)-C(132) | 117.5(12) |                      |          |
| C(127)-C(132)-C(131) | 123.9(11) |                      |          |
| C(134)-C(133)-C(138) | 112.6(9)  |                      |          |
| C(134)-C(133)-Yb(6)  | 125.6(7)  |                      |          |
| C(138)-C(133)-Yb(6)  | 121.8(7)  |                      |          |
| C(133)-C(134)-C(135) | 125.2(9)  |                      |          |
| C(136)-C(135)-C(134) | 119.6(10) |                      |          |
| C(137)-C(136)-C(135) | 118.8(10) |                      |          |
| C(136)-C(137)-C(138) | 121.3(10) |                      |          |
| C(137)-C(138)-C(133) | 122.5(10) |                      |          |
| C(144)-C(139)-C(140) | 113.6(10) |                      |          |
| C(144)-C(139)-Yb(6)  | 123.6(8)  |                      |          |
| C(140)-C(139)-Yb(6)  | 122.8(8)  |                      |          |
| C(139)-C(140)-C(141) | 123.8(13) |                      |          |
| C(142)-C(141)-C(140) | 117.1(14) |                      |          |
| C(143)-C(142)-C(141) | 121.6(14) |                      |          |
| C(142)-C(143)-C(144) | 119.6(15) |                      |          |
| C(143)-C(144)-C(139) | 124.2(13) |                      |          |
| O(25)-C(146)-C(147)  | 109.8(15) |                      |          |
| O(26)-C(147)-C(146)  | 118(2)    |                      |          |
| C(163)-C(158)-C(159) | 119.0(7)  |                      |          |
| C(163)-C(158)-Yb(6)  | 120.0(8)  |                      |          |
| C(159)-C(158)-Yb(6)  | 120.8(8)  |                      |          |

---

- 
- i J. Elguero, E. Gonzalez and R. Jacquier, *Bull. Soc. Chim. Fr.*, 1968, 707-713.
  - ii J. L. Atwood, W. E. Hunter, A. L. Wayda and W. J. Evans, *Inorg. Chem.*, 1981, **20**, 4115-4119.
  - iii G. M. Sheldrick, University of Göttingen, Germany, 1997.
  - iv J. R. van den Hende, P. B. Hitchcock, S. A. Holmes, M. F. Lappert, W.-P. Leung, T. C. W. Mak and S. Prashar, *J. Chem. Soc., Dalton Trans.*, 1995, 1427.
  - v G. B. Deacon and C. M. Forsyth, *Organometallics*, 2003, **22**, 1349; L. N. Bochkarev, T. A. Zheleznova, A. V. Safronova, M. S. Drozdov, S. F. Zhil'tsov, L. N. Zakharov, G. K. Fukin and S. Y. Khorshev, *Russ. Chem. Bull.*, 1998, **47**, 165.
